# Supplementary material for: Diversity of Conopeptides and Their Precursor Genes of Conus Litteratus
Source: MDPI journal article supplement (doi:10.3390/md18090464), 2020-09-14
Supplement: s1 [file s1]

## The gene structure of F superfamily

The blue bold italic is the signal peptide sequences, the blue regular font is the precursor peptide region, the red bold is mature peptide sequence, the black capital letter is the exon region, the black lowercase italic is the intron region, and the green shaded region indicates simple repetition sequences

**LtF101**

[illegible]

Intron:1273bp

**LtF102**

[illegible]

Intron: 1317bp

**LtF103**

[illegible]

Intron:1322bp

**LtF104**

[illegible]

Intron:1337 bp

**LtF105**

[illegible]

Intron:1320bp

**LtF106**

[illegible]

Intron:1336bp

**LtF107**

[illegible]

Intron:1301bp

**LtF108**

[illegible]

Intron:1339bp
